# Supplementary material for: ROS-Induced SIRT2 Upregulation Contributes to Cisplatin Sensitivity in Ovarian Cancer
Source: MDPI journal article supplement (doi:10.3390/antiox9111137), 2020-11-16
Supplement: s1 [file s1]

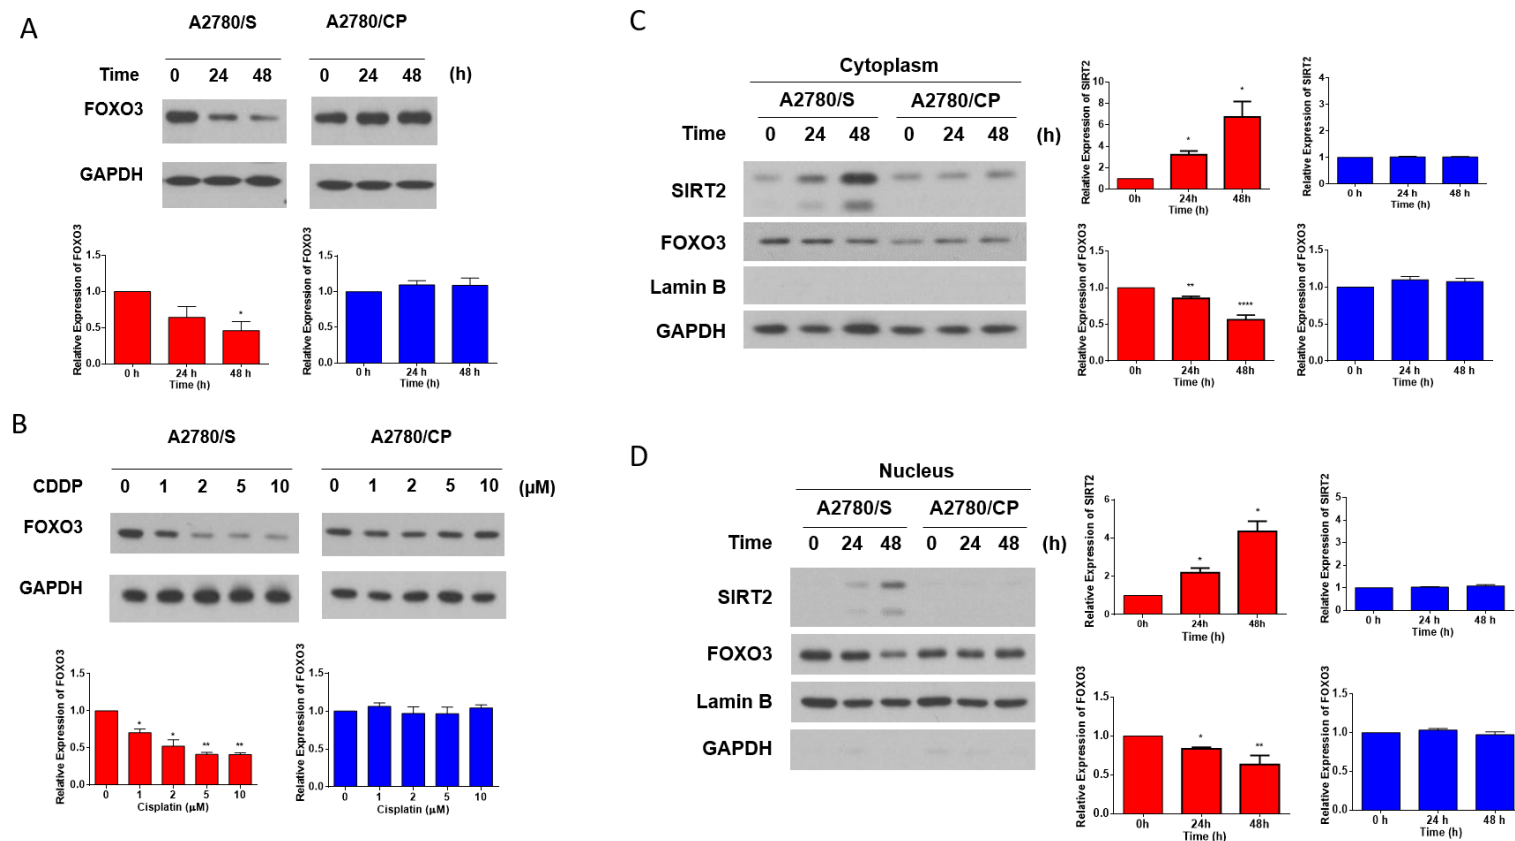

**Figure S1.** FOXO3 might be a downstream target of SIRT2 and contributes to cisplatin sensitivity in ovarian cancer. FOXO3 expression was detected in A2780/S and A2780/CP cells with cisplatin treatment (2  $\mu$ M) for 24 and 48 h (Figure S1A). FOXO3 expression was detected in A2780/S and A2780/CP cells with cisplatin treatment in different concentrations (Figure S1B). FOXO3 expression in cytoplasm and nucleus level was detected in A2780/S and A2780/CP cells with cisplatin treatment (2  $\mu$ M) for 24 and 48 h (Figure S1C). Results are shown as mean  $\pm$  SEM (\* $p \leq 0.05$ , \*\*  $p \leq 0.01$ , \*\*\*  $p \leq 0.001$ ).
